# Supplementary material for: A small-molecule/cytokine combination enhances hematopoietic stem cell proliferation via inhibition of cell differentiation
Source: Stem Cell Res Ther. 2017 Jul 18;8:169. doi: 10.1186/s13287-017-0625-z (PMC5516306; doi:10.1186/s13287-017-0625-z)
Supplement: Supplementary file 2 — Optimal small-molecule combination screening. (A) Selection of small-molecule combinations. (B) Concentration rearrangement of VPA at constant SR1 with the presence of three cytokines. (C) Concentration rearrangement of C433 at constant SR1 with the presence of three cytokines. (D) C433 minimization to determine the final optimal combination. (xls 11.3 kb) (XLSX 11 kb) [file 13287_2017_625_MOESM2_ESM.xlsx]

## Sheet: Sheet1
	Table S2 Optimal small-molecule combination screening
	Table S2a Selection of small-molecule combinations
	Cocktail			Vehicle control		Negative control
	Cytokines	Small molecules		Cytokines	Vehicle
	TPO+SCF+Flt3-L	SR1+VPA		TPO+SCF+Flt3-L	DMSO	TPO+SCF+Flt3-L
		SR1+C433
		VPA+C433
		SR1+VPA+C433
	Table S2b Concentration rearrangement of VPA at constant SR1 with the presence of three cytokines
	Cocktail			Vehicle control		Negative control
	Cytokines	SR1	VPA	Cytokines	Vehicle
	TPO SCF Flt3-L	1 μM	1 mM	TPO SCF Flt3-L	DMSO	TPO SCF Flt3-L
			0.8 mM
			0.6 mM
			0.4 mM
			0.2 mM
	Table S2c Concentration rearrangement of C433 at constant SR1 with the presence of three cytokines
	Cocktail			Vehicle control		Negative control
	Cytokines	SR1	C433	Cytokines	Vehicle
	TPO SCF Flt3-L	1 μM	1 μM	TPO SCF Flt3-L	DMSO	TPO SCF Flt3-L
			0.8 μM
			0.6 μM
			0.4 μM
			0.2 μM
	Table S2d C433 minimization to determine the final optimal combination
	Group name		Cytokines	Small molecules
	Combination 1		TPO+SCF+Flt3-L	SR1 1 μM+VPA 0.2 mM+C433 0.2 μM
	Combination 2			SR1 1 μM+VPA 0.1 mM+C433 0.2 μM
	Vehicle control			DMSO
